# Supplementary material for: Detection of quantitative trait loci controlling pre-harvest sprouting resistance by using backcrossed populations of japonica rice cultivars
Source: PubMed Central journal article supplement — Theor Appl Genet. 2010 Feb 10;120(8):1547–57. doi: 10.1007/s00122-010-1275-z (PMC2859223; doi:10.1007/s00122-010-1275-z), 2010-02-10
Supplement: 122_2010_1275_MOESM2_ESM.pdf [file 122_2010_1275_MOESM2_ESM.pdf]

Figure S1. Hori *et al.*

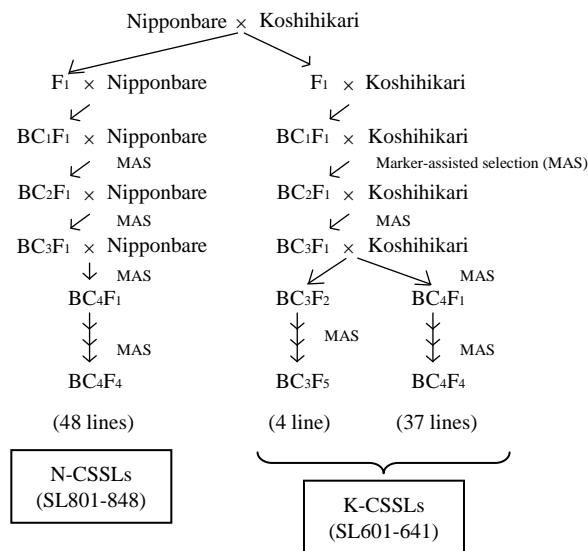

Figure S1. Breeding scheme for the development of chromosome substitution lines (CSSLs) carrying Koshihikari chromosome segments in the Nipponbare genetic background (N-CSSLs) and carrying Nipponbare chromosome segments in the Koshihikari genetic background (K-CSSLs).
