# Supplementary material for: Detection of quantitative trait loci controlling pre-harvest sprouting resistance by using backcrossed populations of japonica rice cultivars
Source: PubMed Central journal article supplement — Theor Appl Genet. 2010 Feb 10;120(8):1547–57. doi: 10.1007/s00122-010-1275-z (PMC2859223; doi:10.1007/s00122-010-1275-z), 2010-02-10
Supplement: 122_2010_1275_MOESM3_ESM.pdf [file 122_2010_1275_MOESM3_ESM.pdf]

Figure S2. Hori *et al.*

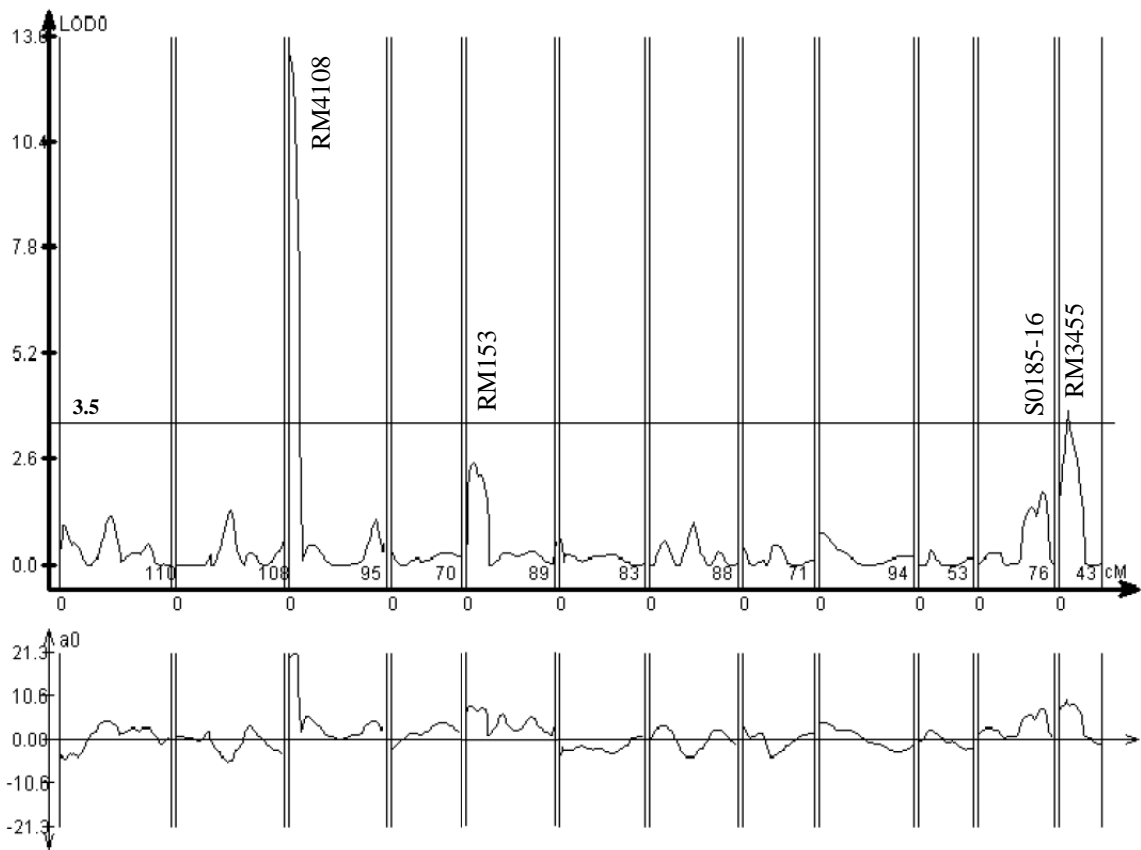

Figure S2. Composite interval mapping results in N-BILs. The horizontal line indicate significant threshold that were determined by 1,000-times permutation test. Nearest marker names from the LOD peaks are shown.
