# Supplementary material for: Detection of quantitative trait loci controlling pre-harvest sprouting resistance by using backcrossed populations of japonica rice cultivars
Source: PubMed Central journal article supplement — Theor Appl Genet. 2010 Feb 10;120(8):1547–57. doi: 10.1007/s00122-010-1275-z (PMC2859223; doi:10.1007/s00122-010-1275-z), 2010-02-10
Supplement: 122_2010_1275_MOESM4_ESM.pdf [file 122_2010_1275_MOESM4_ESM.pdf]

Figure S3. Hori *et al.*

|                                                                                   |     |            |            |            |            |            |     |
|-----------------------------------------------------------------------------------|-----|------------|------------|------------|------------|------------|-----|
| Italica Livorno                                                                   | 1   | ATCTGAATAC | ACTGGCTAGC | AAGCAAAGCT | AGGTAGAGGC | CAGGCCATAG | 50  |
| Nipponbare                                                                        | 1   | ATCTGAATAC | ACTGGCTAGC | AAGCAAAGCT | AGGTAGAGGC | CAGGCCATAG | 50  |
| Koshihikari                                                                       | 1   | ATCTGAATAC | ACTGGCTAGC | AAGCAAAGCT | AGGTAGAGGC | CAGGCCATAG | 50  |
| Hayamasari                                                                        | 1   | ATCTGAATAC | ACTGGCTAGC | AAGCAAAGCT | AGGTAGAGGC | CAGGCCATAG | 50  |
| 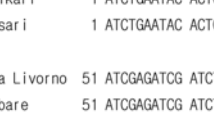 |     |            |            |            |            |            |     |
| Italica Livorno                                                                   | 51  | ATCGAGATCG | ATCTGCAGGT | GCAGTGCGGT | GGGTGGGCAT | GGCGACGAAA | 100 |
| Nipponbare                                                                        | 51  | ATCGAGATCG | ATCTGCAGGT | GCAGTGCGGT | GGGTGGGCAT | GGCGACGAAA | 100 |
| Koshihikari                                                                       | 51  | ATCGAGATCG | ATCTGCAGGT | GCAGTGCGGT | GGGTGGGCAT | GGCGACGAAA | 100 |
| Hayamasari                                                                        | 51  | ATCGAGATCG | ATCTGCAGGT | GCAGTGCGGT | GGGTGGGCAT | GGCGACGAAA | 100 |
|  |     |            |            |            |            |            |     |
| Italica Livorno                                                                   | 101 | GCTGGGTTGA | TGCGCACGCT | CCTGGCCCTG | AACCTCCCTT | TCTTCACTTT | 150 |
| Nipponbare                                                                        | 101 | GCTGGGTTGA | TGCGCACGCT | CCTGGCCCTG | AACCTCCACT | TCTTCACTTT | 150 |
| Koshihikari                                                                       | 101 | GCTGGGTTGA | TGCGCACGCT | CCTGGCCCTG | AACC-----  | -----      | 134 |
| Hayamasari                                                                        | 101 | GCTGGGTTGA | TGCGCACGCT | CCTGGCCCTG | AACC-----  | -----      | 134 |
|  |     |            |            |            |            |            |     |
| Italica Livorno                                                                   | 151 | CTCGACGCG  | TGCGGCTGCC | AGTGGCGCTC | ATGCCCTAGT | CCCGGCGGAG | 200 |
| Nipponbare                                                                        | 151 | CTCGACGCG  | TGCGGCTGCC | AGTGGCGCTC | ATGCCCTAGT | CCCGGCGGAG | 200 |
| Koshihikari                                                                       | 134 | -----      | -----      | -----      | -----      | -----      | 134 |
| Hayamasari                                                                        | 134 | -----      | -----      | -----      | -----      | -----      | 134 |
|  |     |            |            |            |            |            |     |
| Italica Livorno                                                                   | 201 | GAGCGCGTGG | CGGTGGCGGT | GCGCGTGGCG | GTGGTGGAGG | GCGTGGAGGT | 250 |
| Nipponbare                                                                        | 201 | GAGCGCGTGG | CGGTGGCGGT | GCGCGTGGCG | GTGGTGGAGG | GCGTGGAGGT | 250 |
| Koshihikari                                                                       | 135 | -----GTTGG | CGGTGGCGGT | GCGCGTGGCG | GTGGTGGAGG | GCGTGGAGGT | 179 |
| Hayamasari                                                                        | 135 | -----GTTGG | CGGTGGCGGT | GCGCGTGGCG | GTGGTGGAGG | GCGTGGAGGT | 179 |
|  |     |            |            |            |            |            |     |
| Italica Livorno                                                                   | 251 | GGTGGCGGGA | GCGGCGGAGG | TTCAGGTGGA | GCGCGCGGTT | CAGSTGGAGG | 300 |
| Nipponbare                                                                        | 251 | GGTGGCGGGA | GCGGCGGAGG | TTCAGGTGGA | GCGCGCGGTT | CAGSTGGAGG | 300 |
| Koshihikari                                                                       | 180 | GGTGGCGGGA | GCGGCGGAGG | TTCAGGTGGA | GCGCGCGGTT | CAGSTGGAGG | 229 |
| Hayamasari                                                                        | 180 | GGTGGCGGGA | GCGGCGGAGG | TTCAGGTGGA | GCGCGCGGTT | CAGSTGGAGG | 229 |

Figure S3. Partial sequence alignment from 5'UTR region of *qLTG3-1*. DNA sequences from Italice Livorno (AB369214), Hayamasari (AB369215), Nipponbare and Koshihikari were aligned using ClustalW. \* above the alignment denotes nonsynonymous substitution between Italice Livorno and Nipponbare. Arrow indicates the translation initiation site of *qLTG3-1*.
