# Supplementary material for: Detection of quantitative trait loci controlling pre-harvest sprouting resistance by using backcrossed populations of japonica rice cultivars
Source: PubMed Central journal article supplement — Theor Appl Genet. 2010 Feb 10;120(8):1547–57. doi: 10.1007/s00122-010-1275-z (PMC2859223; doi:10.1007/s00122-010-1275-z), 2010-02-10
Supplement: 122_2010_1275_MOESM5_ESM.pdf [file 122_2010_1275_MOESM5_ESM.pdf]

Figure S4. Hori *et al.*

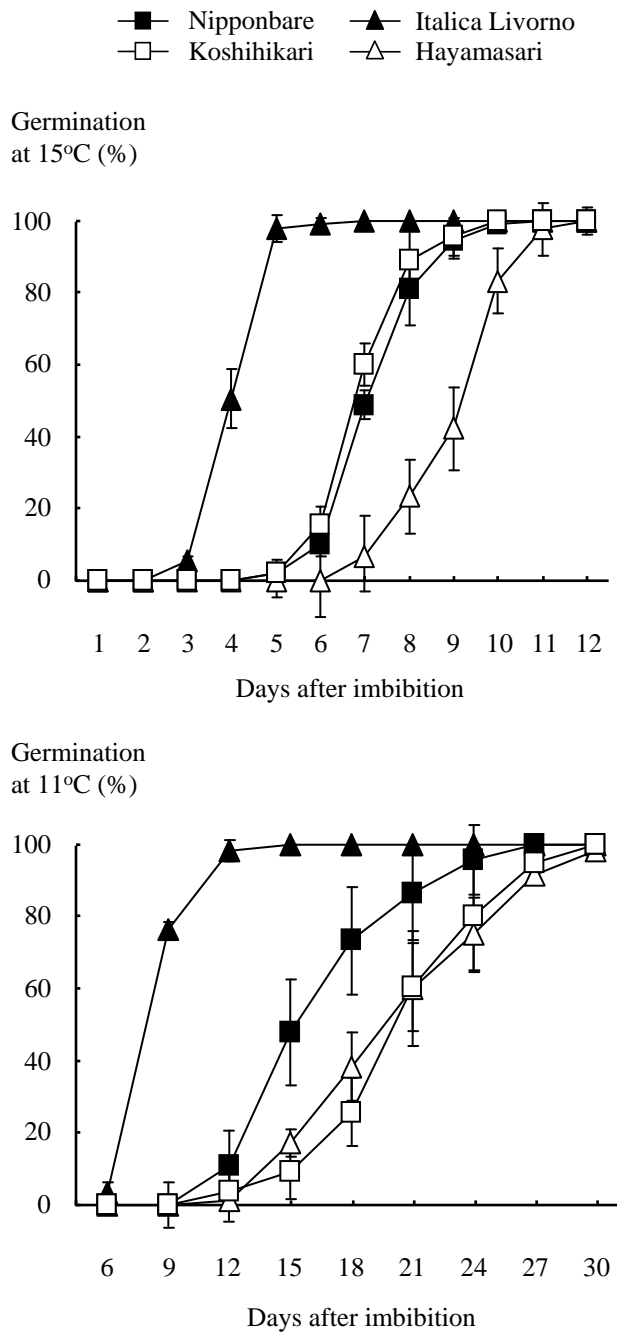

Figure S4. Transition of germination percentages in Nipponbare, Koshihikari, Italice Livorno and Hayamasari under low-temperature at 15°C and 11°C. Average germination percentages and standard deviations are shown for Nipponbare (closed square), Koshihikari (open square), Italice Livorno (open triangle) and Hayamasari (closed triangle).
